# Supplementary material
Source: PubMed Central journal article supplement (PMC3383227)
Supplement: supp_dev.079699_DEV079699TablesS1-S2.pdf [file supp_dev.079699_DEV079699TablesS1-S2.pdf]

**Table S1. QPCR primers**

| <b>Gene</b>         | <b>Forward</b>               | <b>Reverse</b>             |
|---------------------|------------------------------|----------------------------|
| <i>Foxp1</i>        | CGAATGTTTGCTTACTTCCGACGC     | ACTTCATCCACTGTCCATACTGCC   |
| <i>Foxp2</i>        | GCCAGGCTGTGAAAGCATATGTGA     | CATTTGCACTCGACATTGGGCAGT   |
| <i>Sox2</i>         | TGCACATGGCCCAGCACT           | TTCTCCAGTTCGCAGTCCAG       |
| <i>Sox9</i>         | AGACCAGTACCCGCATCTGCACAA     | TCTCTTCTCGCTCTCGTTCAGCA    |
| <i>Nkx2.1</i>       | TCCTCGGAAAGACAGCATCAGCTT     | TCGTGTGCTTTGGACTCATCGACA   |
| <i>Segb1a1</i>      | ATACCCTCCCACAAGAGACCAGGATA   | ACACAGGGCAGTGACAAGGCTTTA   |
| <i>Segb3a2</i>      | GCTGGTATCTATCTTTCTGCTGGTG    | ACAACAGGGAGACGGTTGATGAGA   |
| <i>Cbr2</i>         | TGAATTTCAAGTGGCCTGAGGG       | ACTTTGGCTCCTGAGGCGT        |
| <i>Foxj1</i>        | AGTGGATCACGGACAACCTTCTGCT    | TTCTCCCAGGCACTTTGATGAAG    |
| <i>Tubb4b</i>       | AACCCGGCACCATGGACTCTGT       | TGCCTGCTCCGGATTGACCAAATA   |
| <i>Stat6</i>        | GGCCACCATCAGACAAATACTTCAAGGG | TTGAGTTCTTCTGCTTCCGATGG    |
| <i>Spdef</i>        | TTGTGGGCGAGGTCCTGAAAGATA     | AAAGCCACTTCTGCACGTTACCAG   |
| <i>Agr2</i>         | ACCGGCTCTACGCTTATGAACCTT     | AAGTCCACAGTGCTTCTGCCTTCT   |
| <i>Muc5ac</i>       | TCGTACCATGAACACCGCTCTGAT     | AGGTGGGATGATGGTCACCCATT    |
| <i>Muc5b</i>        | ATGGGCAGCAGAAACTGGAGCTG      | TCTGACTGTCTCCGGTGAGTTCTA   |
| <i>Muc2</i>         | TGACACCATCTACCTCACCCACAA     | TGGTGTAGGCATCGTTCTTCTCA    |
| <i>Foxa3</i>        | ATGCTGGGCTCAGTGAAGATGGA      | AAGGTCATGTAGGAGTTGAGAGGG   |
| <i>Cla3</i>         | TATGAGGGCATCGTCATCGCCATA     | GAGGCCTGAGTCACCATGTCTTTAT  |
| <i>Tff2</i>         | TTTGGGACTGCATGCTCTGGTAGA     | AGCCACAGTTCTTTCTGTTGTGGG   |
| <i>Ascl1</i>        | GAGGAACAAGAGCTGCTGGACTTT     | TGACGTCGTTGGCGAGAAACACTA   |
| <i>Sftpc/Spc</i>    | ACCCTGTGTGGAGAGCTACCA        | TTTGCGGAGGGTCTTTCTT        |
| <i>Hes1</i>         | AAAGCCTATCATGGAGAAGAGGCG     | GGAATGCCGGAGCTATCTTTCTT    |
| <i>Hes5</i>         | CGTCAGCTACCTGAAACACAGCAA     | AGTAGCCCTCGCTGTAGTCCT      |
| <i>Hey1</i>         | CTTGCAGATGACTGTGGATCACCT     | AAACTCCGATAGTCCATAGCCAGG   |
| <i>Hey2</i>         | TTTGAAGATGCTCCAGGCTACAGG     | AGCACTCTCGGAATCCAATGCTCA   |
| <i>Pofut1</i>       | TGTTACAGGCATTTCCCTTACGG      | AGTGCGAGCACAGGATGCTCTTT    |
| <i>Notch1</i>       | TTGAGATGCTCCAGCCAAGT         | AGGATTGGAGTCCCTGGCATCGTT   |
| <i>Notch2</i>       | CGTCAGACTGGCGACTTCACTTT      | TCGTGATATTCCGCTCACAGGT     |
| <i>Notch3</i>       | ATGTGCAAATGGAGGTCGGTGC       | TGAGTGGCAAGGGTCTTCCAG      |
| <i>Notch4</i>       | TGCTGCTCTTGCCACTCAATTTCC     | TCAGGCAGGTGCCTCCGTT        |
| <i>Dll1</i>         | AAGATGTGCGACCCTGGCTGGAAA     | CAGTATCCATGTTGGTCATCACACCC |
| <i>Dll3</i>         | TTTACCTGGGCTGGACCTTGTGAT     | GCACATTCAAAGGAGCCAGAGGTT   |
| <i>Dll4</i>         | AGTGTGCCTGCGATGAGGGAT        | ATTCTTGACGGAGAGTGGTGAGT    |
| <i>Jag1</i>         | ACCGTAATCGCATCGTACTGCCTT     | ATTACTGGAATCCCAGGCCTCCACC  |
| <i>Jag2</i>         | TCGTCATTCCCTTTCAGTTTCGCTT    | ATCTGGAGTGGTGTGATTGTCCCAG  |
| <i>AGR2 (human)</i> | CCAGAAATTGGCAGAGCAGTTTGTCC   | TACTGGCCATCAGGAGAAAGGTGT   |

**Table S2. Microarray analysis of *Shh-cre* control and *Foxp1/4<sup>ShhcreDKO</sup>* mutant lungs at E14.5**

| Gene symbol   | gene_assignment                                                                  | Ab folds | Fold-change (KO vs. control) |
|---------------|----------------------------------------------------------------------------------|----------|------------------------------|
| EG665955      | FJ556972 // EG665955 // predicted gene, EG665955 // 5 B3 // 665955               | 36.4     | -36.4                        |
| Xist          | NR_001463 // Xist // inactive X specific transcripts // X D // 213742 /// NR_001 | 4.76199  | -4.76199                     |
| Zfp125        | ENSMUST00000079237 // Zfp125 // zinc finger protein 125 // --- // 22651 /// AJ00 | 2.91934  | -2.91934                     |
| Cthrc1        | NM_026778 // Cthrc1 // collagen triple helix repeat containing 1 // 15 C // 6858 | 2.77058  | -2.77058                     |
| n/a           | ---                                                                              | 2.53775  | -2.53775                     |
| Cym           | NM_001111143 // Cym // chymosin // 3 F2.3 // 229697 /// BC147477 // Cym // chymo | 2.5251   | -2.5251                      |
| A2m           | alpha-2-macroglobulin                                                            | 2.27946  | -2.27946                     |
| n/a           | ---                                                                              | 2.27944  | -2.27944                     |
| Trim12        | NM_023835 // Trim12 // tripartite motif-containing 12 // 7 E3 // 76681 /// ENSMU | 2.19746  | -2.19746                     |
| Lamp3         | NM_177356 // Lamp3 // lysosomal-associated membrane protein 3 // 16 A3 // 239739 | 2.11631  | -2.11631                     |
| G730007D18Rik | AK144596 // G730007D18Rik // RIKEN cDNA G730007D18 gene // --- // 100038502      | 1.98571  | -1.98571                     |
| n/a           | ---                                                                              | 1.96031  | -1.96031                     |
| Ascl1         | NM_008553 // Ascl1 // achaete-scute complex homolog 1 (Drosophila) // 10 C1 // 1 | 1.93527  | -1.93527                     |
| Serpina6      | NM_007618 // Serpina6 // serine (or cysteine) peptidase inhibitor, clade A, memb | 1.89658  | -1.89658                     |
| Cps1          | NM_001080809 // Cps1 // carbamoyl-phosphate synthetase 1 // 1 C3 1 43.4 cM // 22 | 1.87436  | -1.87436                     |
| n/a           | ---                                                                              | 1.86076  | -1.86076                     |
| Gm7120        | NM_001039244 // Gm7120 //                                                        | 1.84847  | -1.84847                     |

|               |                                                                                  |         |          |
|---------------|----------------------------------------------------------------------------------|---------|----------|
|               | predicted gene 7120 // 13 D2.3 // 633640 /// ENSMUST00                           |         |          |
| Acp1          | NM_001110239 // Acp1 // acid phosphatase 1, soluble // 12 A2 // 11431 /// NM_021 | 1.81548 | -1.81548 |
| n/a           | ---                                                                              | 1.81062 | -1.81062 |
| Nr1h5         | NM_198658 // Nr1h5 // nuclear receptor subfamily 1, group H, member 5 // 3 F2.2  | 1.80988 | -1.80988 |
| Alb           | NM_009654 // Alb // albumin // 5 E1 5 50.0 cM // 11657 /// ENSMUST00000031314 // | 1.79378 | -1.79378 |
| Cbr2          | NM_007621 // Cbr2 // carbonyl reductase 2 // 11 E2 11 72.5 cM // 12409 /// ENSMU | 1.77952 | -1.77952 |
| 4833420G17Rik | NM_001113550 // 4833420G17Rik // RIKEN cDNA 4833420G17 gene // 13 D2.3 // 67392  | 1.7695  | -1.7695  |
| Pgcp          | NM_018755 // Pgcp // plasma glutamate carboxypeptidase // 15 B3.2 // 54381 /// N | 1.7594  | -1.7594  |
| 4933409K07Rik | BC059060 // 4933409K07Rik // RIKEN cDNA 4933409K07 gene // 4 A5 // 108816 /// BC | 1.75297 | -1.75297 |
| Serinc2       | NM_172702 // Serinc2 // serine incorporator 2 // 4 D2.2 // 230779 /// BC031720 / | 1.74251 | -1.74251 |
| Art4          | NM_026639 // Art4 // ADP-ribosyltransferase 4 // 6 G1 6 66.5 cM // 109978 /// EN | 1.73703 | -1.73703 |
| Mgp           | NM_008597 // Mgp // matrix Gla protein // 6 G1 // 17313 /// ENSMUST00000032342 / | 1.69343 | -1.69343 |
| Scgb3a2       | NM_054038 // Scgb3a2 // secretoglobin, family 3A, member 2 // 18 C-D // 117158 / | 1.69    | -1.69    |
| C030030A07Rik | NM_001039558 // C030030A07Rik // RIKEN cDNA C030030A07 gene // 6 G1 // 654818 // | 1.65654 | -1.65654 |
| 2610044O15Rik | ---                                                                              | 1.64385 | -1.64385 |
| Anxa1         | NM_010730 // Anxa1 // annexin A1 // 19 B 19 18.0 cM // 16952 ///                 | 1.60904 | -1.60904 |

|               |                                                                                  |         |          |
|---------------|----------------------------------------------------------------------------------|---------|----------|
|               | ENSMUST00000025                                                                  |         |          |
| St6gal2       | NM_172829 // St6gal2 // beta galactoside alpha 2,6 sialyltransferase 2 // 17 C / | 1.6045  | -1.6045  |
| Cntn4         | NM_001109749 // Cntn4 // contactin 4 // 6 E2 // 269784 /// NM_173004 // Cntn4 // | 1.59978 | -1.59978 |
| n/a           | ---                                                                              | 1.59207 | -1.59207 |
| n/a           | ---                                                                              | 1.59207 | -1.59207 |
| Nr1h5         | nuclear receptor subfamily 1, group H, member 5                                  | 1.591   | -1.591   |
| Lect1         | NM_010701 // Lect1 // leukocyte cell derived chemotaxin 1 // 14 D3 // 16840 ///  | 1.58707 | -1.58707 |
| 9130008F23Rik | NM_027834 // 9130008F23Rik // RIKEN cDNA 9130008F23 gene // 17 C // 71583 /// EN | 1.58396 | -1.58396 |
| Pcdhb11       | NM_053136 // Pcdhb11 // protocadherin beta 11 // 18 B3 // 93882 /// ENSMUST00000 | 1.5822  | -1.5822  |
| 5730407I07Rik | ENSMUST00000069422 // 5730407I07Rik // RIKEN cDNA 5730407I07 gene // --- // 7051 | 1.57093 | -1.57093 |
| Gstm6         | NM_008184 // Gstm6 // glutathione S-transferase, mu 6 // 3 F2.3 // 14867 /// ENS | 1.56977 | -1.56977 |
| n/a           | ---                                                                              | 1.5673  | -1.5673  |
| Plcd3         | phospholipase C, delta 3                                                         | 1.5528  | -1.5528  |
| AK041797      | ---                                                                              | 1.5528  | -1.5528  |
| C030011O14Rik | ---                                                                              | 1.5528  | -1.5528  |
| n/a           | ---                                                                              | 1.5528  | -1.5528  |
| n/a           | ---                                                                              | 1.5528  | -1.5528  |
| n/a           | ---                                                                              | 1.5528  | -1.5528  |
| n/a           | ---                                                                              | 1.5528  | -1.5528  |
| Qpct          | NM_027455 // Qpct // glutaminyl-peptide cyclotransferase (glutaminyl cyclase) // | 1.54484 | -1.54484 |
| Ccl28         | NM_020279 // Ccl28 // chemokine (C-C motif) ligand 28 // --- // 56838 /// ENSMUS | 1.52822 | -1.52822 |
| Gm8840        | XR_032645 // Gm8840 // predicted gene 8840 // 1 C3 // 667842                     | 1.51585 | -1.51585 |

|               |                                                                                  |         |          |
|---------------|----------------------------------------------------------------------------------|---------|----------|
| Gm9078        | XR_031413 // Gm9078 // predicted gene 9078 // X C3 // 668271                     | 1.50366 | -1.50366 |
| Gabra5        | NM_176942 // Gabra5 // gamma-aminobutyric acid (GABA) A receptor, subunit alpha  | 1.50264 | 1.50264  |
| E330027M22Rik | AK054458 // E330027M22Rik // RIKEN cDNA gene, E330027M22Rik // --- // 100038419  | 1.50502 | 1.50502  |
| n/a           | ---                                                                              | 1.51105 | 1.51105  |
| Fgf14         | NM_207667 // Fgf14 // fibroblast growth factor 14 // 14 E5 14 59.0 cM // 14169 / | 1.51452 | 1.51452  |
| Rprl2         | NR_004439 // Rprl2 // ribonuclease P RNA-like 2 // --- // 19784                  | 1.51685 | 1.51685  |
| Plac9         | NM_207229 // Plac9 // placenta specific 9 // 14 B // 211623 /// BC032982 // Plac | 1.51819 | 1.51819  |
| Snord33       | NR_001277 // Snord33 // small nucleolar RNA, C/D box 33 // 7 B4 // 27208         | 1.52073 | 1.52073  |
| n/a           | ---                                                                              | 1.52452 | 1.52452  |
| Zfp868        | NM_172754 // Zfp868 // zinc finger protein 868 // 8 B3.3 // 234362 /// NM_001045 | 1.52483 | 1.52483  |
| Snora44       | AF357394 // Snora44 // small nucleolar RNA, H/ACA box 44 // 4 4 // 100217418     | 1.52484 | 1.52484  |
| BC030870      | ENSMUST00000098713 // BC030870 // cDNA sequence BC030870 // --- // 407795        | 1.52645 | 1.52645  |
| snRNA         | ---                                                                              | 1.52858 | 1.52858  |
| Rmrp          | NR_001460 // Rmrp // RNA component of mitochondrial RNAase P // 4 B1 // 19782    | 1.53004 | 1.53004  |
| snRNA         | ---                                                                              | 1.53176 | 1.53176  |
| Fam183b       | NM_029283 // Fam183b // family with sequence similarity 183, member B // 11 B1.3 | 1.53187 | 1.53187  |
| Ccdc115       | NM_027159 // Ccdc115 // coiled-coil domain containing 115 // 1 B // 69668 /// EN | 1.53255 | 1.53255  |
| Gm10484       | AK142929 // Gm10484 // predicted                                                 | 1.53306 | 1.53306  |

|          |                                                                                  |         |         |
|----------|----------------------------------------------------------------------------------|---------|---------|
|          | gene 10484 // --- // 100038503                                                   |         |         |
| Snhg1    | AK051045 // Snhg1 // small nucleolar RNA host gene (non-protein coding) 1 // 19  | 1.53383 | 1.53383 |
| Gm9282   | XR_033945 // Gm9282 // predicted gene 9282 // 12 A1.3 // 668645 /// XR_034054 // | 1.53816 | 1.53816 |
| Capsl    | NM_029341 // Capsl // calcyphosine-like // 15 A1 // 75568 /// ENSMUST00000042360 | 1.53888 | 1.53888 |
| snRNA    | ---                                                                              | 1.54879 | 1.54879 |
| Trappc21 | NM_021502 // Trappc21 // trafficking protein particle complex 2-like // 8 E1 //  | 1.55072 | 1.55072 |
| Snora34  | AF357396 // Snora34 // small nucleolar RNA, H/ACA box 34 // 15 15 // 100217417   | 1.55249 | 1.55249 |
| Slc34a2  | NM_011402 // Slc34a2 // solute carrier family 34 (sodium phosphate), member 2 // | 1.55307 | 1.55307 |
| Pcsk6    | NM_011048 // Pcsk6 // proprotein convertase subtilisin/kexin type 6 // 7 C 7 28. | 1.56027 | 1.56027 |
| Ear2     | NM_007895 // Ear2 // eosinophil-associated, ribonuclease A family, member 2 // 1 | 1.57029 | 1.57029 |
| Phxr4    | BC107288 // Phxr4 // per-hexamer repeat gene 4 // 9 A1 // 18689 /// X12806 // Ph | 1.57534 | 1.57534 |
| Matn2    | NM_016762 // Matn2 // matrilin 2 // 15 B3.3 // 17181 /// ENSMUST00000022947 // M | 1.5794  | 1.5794  |
| Efhc1    | EU520262 // Efhc1 // EF-hand domain (C-terminal) containing 1 // 1 A5 // 71877 / | 1.58143 | 1.58143 |
| Vsig1    | NM_030181 // Vsig1 // V-set and immunoglobulin domain containing 1 // X F1 // 78 | 1.59441 | 1.59441 |
| Cubn     | NM_001081084 // Cubn // cubilin (intrinsic factor-cobalamin receptor) // 2 A1 2  | 1.60886 | 1.60886 |
| Kdm5d    | NM_011419 // Kdm5d // lysine (K)-                                                | 1.60974 | 1.60974 |

|               |                                                                                  |         |         |
|---------------|----------------------------------------------------------------------------------|---------|---------|
|               | specific demethylase 5D // Y A1 // 20592 /// EN                                  |         |         |
| Acvr1c        | NM_001111030 // Acvr1c // activin A receptor, type IC // 2 C1.1 // 269275 /// NM | 1.6164  | 1.6164  |
| Fgf1          | NM_010197 // Fgf1 // fibroblast growth factor 1 // 18 B3 18 19.0 cM // 14164 /// | 1.61827 | 1.61827 |
| Rassf9        | NM_146240 // Rassf9 // Ras association (RalGDS/AF-6) domain family (N-terminal)  | 1.62071 | 1.62071 |
| Rnu2          | NR_004414 // Rnu2 // U2 small nuclear RNA // --- // 19848 /// NR_004414 // Rnu2  | 1.62103 | 1.62103 |
| Kcnip4        | NM_030265 // Kcnip4 // Kv channel interacting protein 4 // 5 B3 // 80334 /// ENS | 1.63221 | 1.63221 |
| Dkk1          | NM_010051 // Dkk1 // dickkopf homolog 1 (Xenopus laevis) // 19 C2 // 13380 /// E | 1.63962 | 1.63962 |
| snRNA         | ---                                                                              | 1.66388 | 1.66388 |
| B230354O11Rik | AK046228 // B230354O11Rik // RIKEN cDNA B230354O11 gene // 12 A1.3 // 668468 /// | 1.66391 | 1.66391 |
| AW112010      | EF660528 // AW112010 // expressed sequence AW112010 // 19 A // 107350 /// ENSMUS | 1.67792 | 1.67792 |
| Adam28        | NM_010082 // Adam28 // a disintegrin and metallopeptidase domain 28 // 14 D2 //  | 1.69066 | 1.69066 |
| AK009175      | ---                                                                              | 1.69391 | 1.69391 |
| Abhd1         | abhydrolase domain containing 1                                                  | 1.6956  | 1.6956  |
| Trip6         | thyroid hormone receptor interactor 6                                            | 1.71235 | 1.71235 |
| snRNA         | ---                                                                              | 1.72719 | 1.72719 |
| unknown cDNA  | ---                                                                              | 1.73924 | 1.73924 |
| Pcdh10        | NM_001098171 // Pcdh10 // protocadherin 10 // 3 C // 18526 /// NM_011043 // Pcdh | 1.74845 | 1.74845 |
| mitochondrion | ---                                                                              | 1.77531 | 1.77531 |
| Rny1          | NR_004419 // Rny1 // RNA, Y1 small cytoplasmic, Ro-associated //                 | 1.8161  | 1.8161  |

|                        |                                                                                  |         |         |
|------------------------|----------------------------------------------------------------------------------|---------|---------|
|                        | 6 6 54.3 cM //                                                                   |         |         |
| Naaladl2               | XM_975226 // Naaladl2 // N-acetylated alpha-linked acidic dipeptidase-like 2 //  | 1.82424 | 1.82424 |
| Bend6                  | NM_177235 // Bend6 // BEN domain containing 6 // 1 B // 320705 /// ENSMUST000000 | 1.86022 | 1.86022 |
| Emb                    | NM_010330 // Emb // embigin // 13 D2.3 // 13723 /// ENSMUST00000022242 // Emb // | 1.86958 | 1.86958 |
| Ccdc67                 | NM_181816 // Ccdc67 // coiled-coil domain containing 67 // 9 A2 // 234964 /// EN | 1.8701  | 1.8701  |
| Gtf3c2/Mpv17 transgene | ---                                                                              | 1.87106 | 1.87106 |
| Gm9943                 | ENSMUST00000067349 // Gm9943 // predicted gene 9943 // --- // 100036531 /// ENSM | 1.88364 | 1.88364 |
| 1700003M02Rik          | NM_027041 // 1700003M02Rik // RIKEN cDNA 1700003M02 gene // 4 A5 // 69329 /// EN | 1.88947 | 1.88947 |
| 1700011H14Rik          | BC026534 // 1700011H14Rik // RIKEN cDNA 1700011H14 gene // 14 C1 // 67082 /// EN | 1.91853 | 1.91853 |
| Gm606                  | BC086669 // Gm606 // predicted gene 606 // 16 B2 // 239789 /// ENSMUST0000008983 | 1.9554  | 1.9554  |
| Gm10664                | ENSMUST00000098718 // Gm10664 // predicted gene 10664 // --- // 100038489        | 1.98689 | 1.98689 |
| Clca4                  | NM_139148 // Clca4 // chloride channel calcium activated 4 // 3 H2-H3 // 229927  | 2.02107 | 2.02107 |
| mitochondrion          | ---                                                                              | 2.02263 | 2.02263 |
| Ddx3y                  | NM_012008 // Ddx3y // DEAD (Asp-Glu-Ala-Asp) box polypeptide 3, Y-linked // Y A1 | 2.04613 | 2.04613 |
| snRNA                  | ---                                                                              | 2.04892 | 2.04892 |
| snRNA                  | ---                                                                              | 2.04892 | 2.04892 |
| Meig1                  | NM_008579 // Meig1 // meiosis expressed gene 1 // 2 A1 // 104362 /// ENSMUST0000 | 2.05128 | 2.05128 |



|               |                                                                                  |         |         |
|---------------|----------------------------------------------------------------------------------|---------|---------|
| Cldn8         | NM_018778 // Cldn8 // claudin 8 // 16 C3.3 // 54420 /// ENSMUST00000049697 // C1 | 2.06801 | 2.06801 |
| Kcnj13        | NM_001110227 // Kcnj13 // potassium inwardly-rectifying channel, subfamily J, me | 2.10826 | 2.10826 |
| snRNA         | ---                                                                              | 2.12772 | 2.12772 |
| Uty           | NM_009484 // Uty // ubiquitously transcribed tetratricopeptide repeat gene, Y ch | 2.21234 | 2.21234 |
| Cpa3          | NM_007753 // Cpa3 // carboxypeptidase A3, mast cell // 3 A2 3 13.2 cM // 12873 / | 2.28783 | 2.28783 |
| LOC677548     | XR_034974 // LOC677548 // similar to Hippocalcin-like protein 1 (Visinin-like pr | 2.28948 | 2.28948 |
| Hdc           | NM_008230 // Hdc // histidine decarboxylase // 2 E5-G // 15186 /// ENSMUST000000 | 2.31709 | 2.31709 |
| Agr2          | NM_011783 // Agr2 // anterior gradient 2 (Xenopus laevis) // 12 A3 // 23795 ///  | 2.53228 | 2.53228 |
| Gm4638        | XM_001480931 // Gm4638 // predicted gene 4638 // 14 D3 14 // 100043775 /// XM 00 | 2.60111 | 2.60111 |
| LOC280487     | X16670 // LOC280487 // pol polyprotein // 13 A3.1 // 280487                      | 2.60111 | 2.60111 |
| Ear1          | NM_007894 // Ear1 // eosinophil-associated, ribonuclease A family, member 1 // 1 | 2.65703 | 2.65703 |
| mitochondrion | ---                                                                              | 2.72734 | 2.72734 |
| Eif2s3y       | NM_012011 // Eif2s3y // eukaryotic translation initiation factor 2, subunit 3, s | 2.81909 | 2.81909 |
| mitochondrion | ---                                                                              | 3.34419 | 3.34419 |
| Tecrl         | NM_153801 // Tecrl // trans-2,3-enoyl-CoA reductase-like // 5 E1 // 243078 /// E | 3.55249 | 3.55249 |
| Habp2         | NM_146101 // Habp2 // hyaluronic acid binding protein 2 // 19 D2 // 226243 /// E | 4.85063 | 4.85063 |
| mitochondrion | ---                                                                              | 5.2727  | 5.2727  |

|               |     |         |         |
|---------------|-----|---------|---------|
| mitochondrion | --- | 5.71257 | 5.71257 |
| mitochondrion | --- | 6.1976  | 6.1976  |
